# Supplementary material for: Identification of maternally-loaded RNA transcripts in unfertilized eggs of Tribolium castaneum
Source: PubMed Central journal article supplement (PMC3536564; doi:10.1186/1471-2164-13-671), 2012-11-27
Supplement: 1471-2164-13-671-S2.pdf [file 1471-2164-13-671-S2.pdf]

**Table S1.** Previously identified early *T. castaneum* developmental gene expression results.

| Gene (Symbol)                  | Gene ID  | Previous Reported Expression Stage | Reference | Unfertilized Egg Microarray Expression | Fertilized Egg Microarray Expression |
|--------------------------------|----------|------------------------------------|-----------|----------------------------------------|--------------------------------------|
| <i>hunchback (hb)</i>          | TC013553 | maternal                           | [1]       | Yes                                    | Yes                                  |
| <i>caudal (cad)</i>            | TC007576 | maternal                           | [2]       | Yes                                    | Yes                                  |
| <i>dorsal (Dl)</i>             | TC007697 | maternal                           | [3]       | Yes                                    | Yes                                  |
| <i>zerknüllt (zen)</i>         | TC000921 | maternal                           | [4]       | Yes                                    | Yes                                  |
| <i>torso (tor)</i>             | TC009906 | maternal                           | [5]       | Yes                                    | Yes                                  |
| <i>orthodenticle-1 (otd1 )</i> | TC003354 | maternal                           | [6]       | Yes                                    | Yes                                  |
| <i>eagle (Eg)</i>              | TC003409 | maternal                           | [7]       | Yes                                    | Yes                                  |
| <i>pangolin (Pan)</i>          | TC003728 | maternal                           | [7]       | Yes                                    | Yes                                  |
| <i>knirps (Kni)</i>            | TC003413 | blastoderm                         | [8]       | No                                     | Yes                                  |
| <i>maxillopedia (mxp)</i>      | TC000925 | late blastoderm                    | [9]       | No                                     | Yes                                  |

**References:**

1. Wolff C, Sommer R, Schroder R, Glaser G, Tautz D: **Conserved and divergent expression aspects of the Drosophila segmentation gene hunchback in the short germ band embryo of the flour beetle Tribolium.** *Development* 1995, **121**:4227-4236.
2. Schulz C, Schroder R, Hausdorf B, Wolff C, Tautz D: **A caudal homologue in the short germ band beetle Tribolium shows similarities to both, the Drosophila and the vertebrate caudal expression patterns.** *Dev Genes Evol* 1998, **208**:283-289.
3. Chen G, Handel K, Roth S: **The maternal NF-kappaB/dorsal gradient of Tribolium castaneum: dynamics of early dorsoventral patterning in a short-germ beetle.** *Development* 2000, **127**:5145-5156.
4. van der Zee M, Berns N, Roth S: **Distinct functions of the Tribolium zerknüllt genes in serosa specification and dorsal closure.** *Curr Biol* 2005, **15**:624-636.

5. Schoppmeier M, Schroder R: **Maternal torso signaling controls body axis elongation in a short germ insect.** *Curr Biol* 2005, **15**:2131-2136.
6. Schroder R: **The genes orthodenticle and hunchback substitute for bicoid in the beetle Tribolium.** *Nature* 2003, **422**:621-625.
7. Bucher G, Farzana L, Brown SJ, Klingler M: **Anterior localization of maternal mRNAs in a short germ insect lacking bicoid.** *Evol Dev* 2005, **7**:142-149.
8. Cerny AC, Grossmann D, Bucher G, Klingler M: **The Tribolium ortholog of knirps and knirps-related is crucial for head segmentation but plays a minor role during abdominal patterning.** *Dev Biol* 2008, **321**:284-294.
9. Shippy TD, Guo J, Brown SJ, Beeman RW, Denell RE: **Analysis of maxillopedia expression pattern and larval cuticular phenotype in wild-type and mutant tribolium.** *Genetics* 2000, **155**:721-731.
