# Supplementary material for: Identification of maternally-loaded RNA transcripts in unfertilized eggs of Tribolium castaneum
Source: PubMed Central journal article supplement (PMC3536564; doi:10.1186/1471-2164-13-671), 2012-11-27
Supplement: 1471-2164-13-671-S3.pdf [file 1471-2164-13-671-S3.pdf]

GO term enrichment of the fly-beetle comparisons

# Berkeley *Drosophila* Genome Project in situ database

[1, 2]

## Fertilized only:

Molecular Functions

| GO Term                                                                | Aspect | P-value  | Sample frequency | Background frequency |
|------------------------------------------------------------------------|--------|----------|------------------|----------------------|
| GO:0003700 sequence-specific DNA binding transcription factor activity | F      | 5.44e-04 | 35/184 (19.0%)   | 290/3718 (7.8%)      |
| GO:0001071 nucleic acid binding transcription factor activity          | F      | 5.44e-04 | 35/184 (19.0%)   | 290/3718 (7.8%)      |
| GO:0005214 structural constituent of chitin-based cuticle              | F      | 4.36e-03 | 11/184 (6.0%)    | 41/3718 (1.1%)       |
| GO:0042302 structural constituent of cuticle                           | F      | 7.28e-03 | 11/184 (6.0%)    | 43/3718 (1.2%)       |

## Maternal Loaded:

Biological Processes:

| GO Term                                             | Aspect | P-value  | Sample frequency  | Background frequency |
|-----------------------------------------------------|--------|----------|-------------------|----------------------|
| GO:0009987 cellular process                         | P      | 6.59e-16 | 2309/3235 (71.4%) | 2552/3718 (68.6%)    |
| GO:0044237 cellular metabolic process               | P      | 6.62e-15 | 1493/3235 (46.2%) | 1616/3718 (43.5%)    |
| GO:0044267 cellular protein metabolic process       | P      | 9.59e-13 | 567/3235 (17.5%)  | 589/3718 (15.8%)     |
| GO:0006412 translation                              | P      | 5.87e-10 | 207/3235 (6.4%)   | 207/3718 (5.6%)      |
| GO:0022402 cell cycle process                       | P      | 6.84e-10 | 284/3235 (8.8%)   | 288/3718 (7.7%)      |
| GO:0007049 cell cycle                               | P      | 1.37e-09 | 324/3235 (10.0%)  | 331/3718 (8.9%)      |
| GO:0044260 cellular macromolecule metabolic process | P      | 7.08e-09 | 1147/3235 (35.5%) | 1243/3718 (33.4%)    |
| GO:0022403 cell cycle phase                         | P      | 2.24e-   | 242/3235          | 245/3718 (6.6%)      |

| GO Term                                                                    | Aspect | P-value  | Sample frequency  | Background frequency |
|----------------------------------------------------------------------------|--------|----------|-------------------|----------------------|
|                                                                            |        | 08       | (7.5%)            |                      |
| GO:0006996 organelle organization                                          | P      | 2.42e-08 | 480/3235 (14.8%)  | 502/3718 (13.5%)     |
| GO:0000279 M phase                                                         | P      | 2.31e-06 | 191/3235 (5.9%)   | 193/3718 (5.2%)      |
| GO:0006396 RNA processing                                                  | P      | 1.18e-05 | 179/3235 (5.5%)   | 181/3718 (4.9%)      |
| GO:0000278 mitotic cell cycle                                              | P      | 1.92e-05 | 235/3235 (7.3%)   | 241/3718 (6.5%)      |
| GO:0071841 cellular component organization or biogenesis at cellular level | P      | 2.23e-04 | 725/3235 (22.4%)  | 784/3718 (21.1%)     |
| GO:0008152 metabolic process                                               | P      | 5.57e-04 | 1870/3235 (57.8%) | 2088/3718 (56.2%)    |
| GO:0006974 response to DNA damage stimulus                                 | P      | 8.15e-04 | 110/3235 (3.4%)   | 110/3718 (3.0%)      |
| GO:0033036 macromolecule localization                                      | P      | 9.50e-04 | 251/3235 (7.8%)   | 261/3718 (7.0%)      |
| GO:0071842 cellular component organization at cellular level               | P      | 1.80e-03 | 698/3235 (21.6%)  | 757/3718 (20.4%)     |
| GO:0016071 mRNA metabolic process                                          | P      | 2.14e-03 | 140/3235 (4.3%)   | 142/3718 (3.8%)      |
| GO:0000226 microtubule cytoskeleton organization                           | P      | 2.37e-03 | 182/3235 (5.6%)   | 187/3718 (5.0%)      |
| GO:0007051 spindle organization                                            | P      | 3.79e-03 | 119/3235 (3.7%)   | 120/3718 (3.2%)      |
| GO:0006397 mRNA processing                                                 | P      | 5.34e-03 | 133/3235 (4.1%)   | 135/3718 (3.6%)      |
| GO:0033554 cellular response to stress                                     | P      | 5.44e-03 | 175/3235 (5.4%)   | 180/3718 (4.8%)      |
| GO:0006259 DNA metabolic process                                           | P      | 7.47e-03 | 114/3235 (3.5%)   | 115/3718 (3.1%)      |
| GO:0051641 cellular localization                                           | P      | 7.82e-03 | 264/3235 (8.2%)   | 277/3718 (7.5%)      |

Cellular Component:

| GO Term                                 | Aspect | P-value  | Sample frequency | Background frequency |
|-----------------------------------------|--------|----------|------------------|----------------------|
| GO:0044446 intracellular organelle part | C      | 2.30e-24 | 849/3235 (26.2%) | 878/3718 (23.6%)     |

| GO Term                                             | Aspect | P-value  | Sample frequency  | Background frequency |
|-----------------------------------------------------|--------|----------|-------------------|----------------------|
| GO:0044422 organelle part                           | C      | 1.88e-23 | 856/3235 (26.5%)  | 887/3718 (23.9%)     |
| GO:0005622 intracellular                            | C      | 1.99e-17 | 1774/3235 (54.8%) | 1929/3718 (51.9%)    |
| GO:0044424 intracellular part                       | C      | 4.17e-17 | 1662/3235 (51.4%) | 1802/3718 (48.5%)    |
| GO:0005737 cytoplasm                                | C      | 1.37e-14 | 968/3235 (29.9%)  | 1027/3718 (27.6%)    |
| GO:0032991 macromolecular complex                   | C      | 3.91e-13 | 847/3235 (26.2%)  | 896/3718 (24.1%)     |
| GO:0044428 nuclear part                             | C      | 4.42e-13 | 369/3235 (11.4%)  | 375/3718 (10.1%)     |
| GO:0044444 cytoplasmic part                         | C      | 7.10e-12 | 726/3235 (22.4%)  | 765/3718 (20.6%)     |
| GO:0043226 organelle                                | C      | 2.27e-11 | 1362/3235 (42.1%) | 1478/3718 (39.8%)    |
| GO:0043229 intracellular organelle                  | C      | 2.50e-11 | 1361/3235 (42.1%) | 1477/3718 (39.7%)    |
| GO:0031974 membrane-enclosed lumen                  | C      | 1.50e-10 | 311/3235 (9.6%)   | 316/3718 (8.5%)      |
| GO:0070013 intracellular organelle lumen            | C      | 2.95e-10 | 306/3235 (9.5%)   | 311/3718 (8.4%)      |
| GO:0043233 organelle lumen                          | C      | 2.95e-10 | 306/3235 (9.5%)   | 311/3718 (8.4%)      |
| GO:0030529 ribonucleoprotein complex                | C      | 6.35e-09 | 214/3235 (6.6%)   | 215/3718 (5.8%)      |
| GO:0043227 membrane-bounded organelle               | C      | 1.29e-08 | 1156/3235 (35.7%) | 1254/3718 (33.7%)    |
| GO:0043231 intracellular membrane-bounded organelle | C      | 1.41e-08 | 1155/3235 (35.7%) | 1253/3718 (33.7%)    |
| GO:0005623 cell                                     | C      | 1.51e-07 | 1910/3235 (59.0%) | 2118/3718 (57.0%)    |
| GO:0044464 cell part                                | C      | 1.51e-07 | 1910/3235 (59.0%) | 2118/3718 (57.0%)    |
| GO:0031981 nuclear lumen                            | C      | 1.24e-06 | 228/3235 (7.0%)   | 232/3718 (6.2%)      |
| GO:0043234 protein complex                          | C      | 4.57e-06 | 650/3235 (20.1%)  | 695/3718 (18.7%)     |
| GO:0043228 non-membrane-bounded organelle           | C      | 1.46e-   | 460/3235          | 486/3718 (13.1%)     |

| GO Term                                                 | Aspect | P-value  | Sample frequency | Background frequency |
|---------------------------------------------------------|--------|----------|------------------|----------------------|
|                                                         |        | 05       | (14.2%)          |                      |
| GO:0043232 intracellular non-membrane-bounded organelle | C      | 1.46e-05 | 460/3235 (14.2%) | 486/3718 (13.1%)     |
| GO:0005829 cytosol                                      | C      | 1.45e-04 | 122/3235 (3.8%)  | 122/3718 (3.3%)      |
| GO:0031090 organelle membrane                           | C      | 3.38e-04 | 154/3235 (4.8%)  | 156/3718 (4.2%)      |
| GO:0044429 mitochondrial part                           | C      | 9.03e-04 | 162/3235 (5.0%)  | 165/3718 (4.4%)      |
| GO:0005654 nucleoplasm                                  | C      | 2.25e-03 | 169/3235 (5.2%)  | 173/3718 (4.7%)      |
| GO:0005739 mitochondrion                                | C      | 3.71e-03 | 227/3235 (7.0%)  | 236/3718 (6.3%)      |

Molecular Function:

| GO Term                                               | Aspect | P-value  | Sample frequency | Background frequency |
|-------------------------------------------------------|--------|----------|------------------|----------------------|
| GO:0036094 small molecule binding                     | F      | 5.17e-08 | 525/3235 (16.2%) | 552/3718 (14.8%)     |
| GO:1901265 nucleoside phosphate binding               | F      | 1.24e-07 | 486/3235 (15.0%) | 510/3718 (13.7%)     |
| GO:0000166 nucleotide binding                         | F      | 1.24e-07 | 486/3235 (15.0%) | 510/3718 (13.7%)     |
| GO:0097159 organic cyclic compound binding            | F      | 1.24e-07 | 486/3235 (15.0%) | 510/3718 (13.7%)     |
| GO:0003723 RNA binding                                | F      | 1.42e-05 | 194/3235 (6.0%)  | 197/3718 (5.3%)      |
| GO:0035639 purine ribonucleoside triphosphate binding | F      | 5.19e-04 | 333/3235 (10.3%) | 350/3718 (9.4%)      |
| GO:0032555 purine ribonucleotide binding              | F      | 5.19e-04 | 333/3235 (10.3%) | 350/3718 (9.4%)      |
| GO:0032553 ribonucleotide binding                     | F      | 5.19e-04 | 333/3235 (10.3%) | 350/3718 (9.4%)      |
| GO:0017076 purine nucleotide binding                  | F      | 1.07e-03 | 336/3235 (10.4%) | 354/3718 (9.5%)      |
| GO:0016740 transferase activity                       | F      | 2.35e-03 | 387/3235 (12.0%) | 411/3718 (11.1%)     |

## **Not Expressed:**

### Biological Processes:

| GO Term                       | Aspect | P-value  | Sample frequency | Background frequency |
|-------------------------------|--------|----------|------------------|----------------------|
| GO:0006508 proteolysis        | P      | 1.84e-04 | 41/299 (13.7%)   | 218/3718 (5.9%)      |
| GO:0007600 sensory perception | P      | 3.53e-03 | 16/299 (5.4%)    | 53/3718 (1.4%)       |

### Cellular Components:

| GO Term                                 | Aspect | P-value  | Sample frequency | Background frequency |
|-----------------------------------------|--------|----------|------------------|----------------------|
| GO:0005887 integral to plasma membrane  | C      | 5.42e-06 | 23/299 (7.7%)    | 72/3718 (1.9%)       |
| GO:0031226 intrinsic to plasma membrane | C      | 9.89e-06 | 23/299 (7.7%)    | 74/3718 (2.0%)       |
| GO:0016021 integral to membrane         | C      | 5.40e-03 | 54/299 (18.1%)   | 364/3718 (9.8%)      |
| GO:0031224 intrinsic to membrane        | C      | 9.04e-03 | 54/299 (18.1%)   | 370/3718 (10.0%)     |

### Molecular Functions:

| GO Term                                                        | Aspect | P-value  | Sample frequency | Background frequency |
|----------------------------------------------------------------|--------|----------|------------------|----------------------|
| GO:0004175 endopeptidase activity                              | F      | 6.26e-10 | 37/299 (12.4%)   | 124/3718 (3.3%)      |
| GO:0004252 serine-type endopeptidase activity                  | F      | 5.99e-09 | 21/299 (7.0%)    | 45/3718 (1.2%)       |
| GO:0070011 peptidase activity, acting on L-amino acid peptides | F      | 8.20e-08 | 41/299 (13.7%)   | 171/3718 (4.6%)      |
| GO:0008236 serine-type peptidase activity                      | F      | 4.22e-07 | 21/299 (7.0%)    | 54/3718 (1.5%)       |
| GO:0017171 serine hydrolase activity                           | F      | 6.33e-07 | 21/299 (7.0%)    | 55/3718 (1.5%)       |
| GO:0008233 peptidase activity                                  | F      | 7.99e-07 | 41/299 (13.7%)   | 183/3718 (4.9%)      |
| GO:0022836 gated channel activity                              | F      | 4.47e-06 | 15/299 (5.0%)    | 31/3718 (0.8%)       |
| GO:0004222 metalloendopeptidase activity                       | F      | 2.00e-04 | 14/299 (4.7%)    | 34/3718 (0.9%)       |

| GO Term                                                   | Aspect | P-value  | Sample frequency | Background frequency |
|-----------------------------------------------------------|--------|----------|------------------|----------------------|
| GO:0005216 ion channel activity                           | F      | 3.06e-04 | 15/299 (5.0%)    | 40/3718 (1.1%)       |
| GO:0060089 molecular transducer activity                  | F      | 4.18e-04 | 27/299 (9.0%)    | 116/3718 (3.1%)      |
| GO:0004871 signal transducer activity                     | F      | 4.18e-04 | 27/299 (9.0%)    | 116/3718 (3.1%)      |
| GO:0004872 receptor activity                              | F      | 5.07e-04 | 25/299 (8.4%)    | 103/3718 (2.8%)      |
| GO:0022838 substrate-specific channel activity            | F      | 9.22e-04 | 15/299 (5.0%)    | 43/3718 (1.2%)       |
| GO:0042302 structural constituent of cuticle              | F      | 9.22e-04 | 15/299 (5.0%)    | 43/3718 (1.2%)       |
| GO:0004888 transmembrane signaling receptor activity      | F      | 1.11e-03 | 19/299 (6.4%)    | 67/3718 (1.8%)       |
| GO:0022834 ligand-gated channel activity                  | F      | 1.56e-03 | 10/299 (3.3%)    | 20/3718 (0.5%)       |
| GO:0015276 ligand-gated ion channel activity              | F      | 1.56e-03 | 10/299 (3.3%)    | 20/3718 (0.5%)       |
| GO:0038023 signaling receptor activity                    | F      | 2.28e-03 | 21/299 (7.0%)    | 83/3718 (2.2%)       |
| GO:0005214 structural constituent of chitin-based cuticle | F      | 3.01e-03 | 14/299 (4.7%)    | 41/3718 (1.1%)       |
| GO:0022803 passive transmembrane transporter activity     | F      | 3.40e-03 | 15/299 (5.0%)    | 47/3718 (1.3%)       |
| GO:0015267 channel activity                               | F      | 3.40e-03 | 15/299 (5.0%)    | 47/3718 (1.3%)       |
| GO:0008237 metallopeptidase activity                      | F      | 3.47e-03 | 17/299 (5.7%)    | 59/3718 (1.6%)       |

# Fly-Fish database

[3]

## **Fertilized only:**

No enriched terms

## **Maternal Loaded:**

Cellular Components:

| GO Term                                 | Aspect | P-value  | Sample frequency | Background frequency |
|-----------------------------------------|--------|----------|------------------|----------------------|
| GO:0005622 intracellular                | C      | 5.28e-05 | 669/1163 (57.5%) | 703/1276 (55.1%)     |
| GO:0044446 intracellular organelle part | C      | 5.95e-05 | 340/1163 (29.2%) | 348/1276 (27.3%)     |
| GO:0044424 intracellular part           | C      | 1.51e-04 | 626/1163 (53.8%) | 657/1276 (51.5%)     |
| GO:0044422 organelle part               | C      | 2.45e-04 | 341/1163 (29.3%) | 350/1276 (27.4%)     |
| GO:0044428 nuclear part                 | C      | 6.60e-03 | 160/1163 (13.8%) | 161/1276 (12.6%)     |
| GO:0005737 cytoplasm                    | C      | 6.85e-03 | 362/1163 (31.1%) | 375/1276 (29.4%)     |

## **Not expressed:**

No enriched Terms

# De Renzis, *et al.*

De Renzis, *et al.* [4]

**Fertilized only:** no enriched terms

**Maternal loaded:** no enriched terms

**Not expressed:** no enriched terms

# Arbeitman, *et al.*

Arbeitman, *et al.* [5]

**Fertilized only:** no enriched terms

**Maternal loaded:** no enriched terms

**Not expressed:** no enriched terms

## References:

1. Tomancak P, Beaton A, Weiszmamm R, Kwan E, Shu S, Lewis SE, Richards S, Ashburner M, Hartenstein V, Celniker SE, Rubin GM: **Systematic determination of patterns of gene expression during *Drosophila* embryogenesis.** *Genome Biology* 2002, **3**:RESEARCH0088.
2. Tomancak P, Berman BP, Beaton A, Weiszmamm R, Kwan E, Hartenstein V, Celniker SE, Rubin GM: **Global analysis of patterns of gene expression during *Drosophila* embryogenesis.** *Genome Biology* 2007, **8**.
3. Lecuyer E, Yoshida H, Parthasarathy N, Alm C, Babak T, Cerovina T, Hughes TR, Tomancak P, Krause HM: **Global analysis of mRNA localization reveals a prominent role in organizing cellular architecture and function.** *Cell* 2007, **131**:174-187.
4. De Renzis S, Elemento O, Tavazoie S, Wieschaus EF: **Unmasking activation of the zygotic genome using chromosomal deletions in the *Drosophila* embryo.** *Plos Biology* 2007, **5**:1036-1051.
5. Arbeitman MN, Furlong EEM, Imam F, Johnson E, Null BH, Baker BS, Krasnow MA, Scott MP, Davis RW, White KP: **Gene expression during the life cycle of *Drosophila melanogaster*.** *Science* 2002, **297**:2270-2275.
